# Supplementary material for: Pathogenic Variants Associated with Epigenetic Control and the NOTCH Pathway Are Frequent in Classic Hodgkin Lymphoma
Source: MDPI journal article supplement (doi:10.3390/ijms25052457), 2024-02-20

# Supplementary Material

## Pathogenic Variants Associated with Epigenetic Control and the NOTCH Pathway Are Frequent in Classic Hodgkin Lymphoma

**Antonio Santisteban-Espejo 1,2,3,\* , Irene Bernal-Florindo 3,4, Pedro Montero-Pavon 4 , Jose Perez-Requena 1, Lidia Atienza-Cuevas 1, Maria del Carmen Fernandez-Valle 5, Ana Villalba-Fernandez 1 and Marcial Garcia-Rojo 3,4**

1 Department of Pathology, Puerta del Mar University Hospital, 11009 Cadiz, Spain;

jose.perez.sspa@juntadeandalucia.es (J.P.-R.); anavillalbafernandez@hotmail.com (A.V.-F.)

2 Department of Medicine and Surgery, Faculty of Medicine, University of Cadiz, 11003 Cadiz, Spain

3 Institute of Research and Innovation in Biomedical Sciences of the Province of Cadiz (INiBICA),

11009 Cadiz, Spain; iriberni@hotmail.com (I.B.-F.); marcial.garcia.sspa@juntadeandalucia.es (M.G.-R.)

4 Department of Pathology, Jerez de la Frontera University Hospital, 11407 Cadiz, Spain;

pmonteropavon@gmail.com

5 Department of Hematology and Hemotherapy, Puerta del Mar University Hospital, 11009 Cadiz, Spain; macafeva@hotmail.com

Correspondence: antonio.santisteban@uca.es

## **Supplementary Methods 1. Bioinformatics analysis, variant calling and variant categorization**

Sequencing Binary Alignment Map (BAM) files were analyzed with the Ion Report Software (Version 5.16, Thermo Fisher Scientific, Texas, USA). For variant calling, OncoPrint Variant Annotator v3.1 was used. In order to identify and annotate the SNVs, indels and CNVs, the following filter chains were applied in Ion Reporter: frequency cutoff for supporting a variant, SNV 0.04, indel 0.07, hotspot 0.03; total coverage required of reads or no-call, SNV 15, indel 15, hotspot 15; proportion of variant alleles coming overwhelmingly from one strand, SNV 0.96, indel 0.9, hotspot 0.96 for SNV and indel calls; and median of the absolute values of all pairwise differences  $< 0.4$ ; 5% confidence interval CNV ploidy  $\geq$  gain of 2 over normal for CNV calling.

We restricted the analyses to variants with a total coverage of at least 100x. Only genomic variants in coding exon regions were considered. Intronic variants were discarded and variants with an allele frequency  $< 1\%$  or  $> 40\%$  were not considered. Because of they constitute single nucleotide polymorphisms (SNPs) or somatic variants at very low frequency ( $AF < 1\%$ ) in cells other than the tumoral fraction of cHL, or also represent germline mutations ( $AF > 40\%$ ) these variants were not considered in the analysis, as probably not informing about the tumoral clone of the cHL tissue samples evaluated. Additionally, for exclusion of SNPs, information available in dbSNP was also consulted. Then, variants obtained were filtered according to the functional consequence at the aminoacid sequence, and only nonsynonymous variants were considered for further evaluation. Using this pipeline, from an initial set of 38384 variants, we finally obtained 226 variants (58.9%) corresponding to the 32 cHL samples analyzed (HL1-HL32). This stringent filtering process, the concordance of variants obtained in paired samples and the identification of recurrent mutations previously described in cHL, confirm the robustness of the analysis, even considering the possibility of losing variants not considered that could contribute to intratumoral heterogeneity or explain, in part, disease progression.

## **Supplementary legends**

- 1. Supplementary Table 1 (Table S1).** Targeted next-generation sequencing panel for B-cell neoplasms developed for the project.
- 2. Supplementary Figure 1 (Figure S1).** Variant allele frequency of classic Hodgkin lymphoma cases analyzed (n=32).
- 3. Supplementary Figure 2 (Figure S2).** Coverage of classic Hodgkin lymphoma cases analyzed (n=32).
- 4. Supplementary Figure 3 (Figure S3).** Percentage of mutated cases of classic Hodgkin lymphoma (n=32).

**5. Supplementary Figure 4 (Figure S4).** Co-occurrence matrix. The probability of co-occurrence between the mutations of the genes defined in the targeted sequencing panel is shown in red color.

**6. Supplementary Table 2 (Table S2).** Description of the variants identified in classic Hodgkin lymphoma (n=32).

**7. Supplementary Figure 5 (Figure S5).** Clonal evolution of chemorefractory cHL. Cases with novel mutations at relapse previously not identified at diagnosis. Time evolution from diagnosis to relapse is shown in the x-axis. The y-axis shows the mean allele frequency of the variants identified. Common ancestral clone is shown in black color. Mutations identified at diagnosis and relapse are shown in blue color and red color, respectively.

**8. Supplementary Figure 6 (Figure S6).** Clonal evolution of chemorefractory cHL. Cases with selection of mutations at relapse previously identified at diagnosis (clonal selection). Time evolution from diagnosis to relapse is shown in the x-axis. The y-axis shows the mean allele frequency of the variants identified. Common ancestral clone is shown in black color. Mutations identified at diagnosis and relapse are shown in blue color and red color, respectively.

# **1. Supplementary Table 1 (Table S1).**

| Gene    | Chromosome | Number of amplicons | Total bases | Covered bases | Missed bases | Coverage |
|---------|------------|---------------------|-------------|---------------|--------------|----------|
| ID3     | Chr1       | 5                   | 400         | 400           | 0            | 1.000    |
| ARID1A  | Chr1       | 87                  | 7258        | 7187          | 71           | 0.969    |
| BCL10   | Chr1       | 10                  | 762         | 762           | 0            | 1.000    |
| NOTCH2  | Chr1       | 102                 | 8149        | 7958          | 191          | 0.731    |
| XPO1    | Chr2       | 51                  | 3696        | 3674          | 22           | 0.916    |
| CXCR4   | Chr2       | 13                  | 1126        | 1126          | 0            | 1.000    |
| SF3B1   | Chr2       | 68                  | 4505        | 4478          | 27           | 0.961    |
| CASP8   | Chr2       | 24                  | 1913        | 1889          | 24           | 0.984    |
| MYD88   | Chr3       | 14                  | 1054        | 1054          | 0            | 1.000    |
| CD38    | Chr4       | 15                  | 1063        | 1063          | 0            | 1.000    |
| CSF2    | Chr5       | 9                   | 515         | 515           | 0            | 1.000    |
| CSF1R   | Chr5       | 51                  | 3339        | 3339          | 0            | 1.000    |
| NFKBIE  | Chr6       | 21                  | 1623        | 1623          | 0            | 1.000    |
| MYB     | Chr6       | 38                  | 2606        | 2596          | 10           | 0.984    |
| TNFAIP3 | Chr6       | 26                  | 2533        | 2515          | 18           | 0.990    |
| CARD11  | Chr7       | 54                  | 3945        | 3945          | 0            | 1.000    |
| BRAF    | Chr7       | 42                  | 2661        | 2655          | 6            | 0.997    |
| EZH2    | Chr7       | 40                  | 2636        | 2636          | 0            | 1.000    |

|        |       |     |      |      |     |       |
|--------|-------|-----|------|------|-----|-------|
| MYC    | Chr8  | 15  | 1425 | 1425 | 0   | 1.000 |
| PTPRD  | Chr9  | 84  | 6539 | 6516 | 23  | 0.996 |
| CDKN2A | Chr9  | 11  | 1012 | 1008 | 4   | 0.996 |
| ABL1   | Chr9  | 45  | 3769 | 3759 | 10  | 0.991 |
| NOTCH1 | Chr9  | 111 | 8348 | 8274 | 74  | 0.973 |
| TRAF2  | Chr9  | 21  | 1706 | 1706 | 0   | 1.000 |
| FAS    | Chr10 | 17  | 1188 | 1188 | 0   | 1.000 |
| CCND1  | Chr11 | 14  | 988  | 988  | 0   | 1.000 |
| BIRC3  | Chr11 | 28  | 1975 | 1971 | 4   | 0.997 |
| STAT6  | Chr12 | 42  | 2964 | 2955 | 9   | 0.996 |
| FOXO1  | Chr13 | 19  | 2608 | 2529 | 79  | 0.939 |
| LCP1   | Chr13 | 30  | 2184 | 2184 | 0   | 1.000 |
| NFKBIA | Chr14 | 16  | 1074 | 1074 | 0   | 1.000 |
| B2M    | Chr15 | 7   | 420  | 420  | 0   | 1.000 |
| IL32   | Chr16 | 9   | 805  | 605  | 200 | 0.896 |
| CREBBP | Chr16 | 95  | 7949 | 7926 | 23  | 0.995 |
| CD19   | Chr16 | 32  | 1954 | 1954 | 0   | 1.000 |
| CYLD   | Chr16 | 43  | 3211 | 3144 | 67  | 0.978 |
| PLCG2  | Chr16 | 62  | 4438 | 4438 | 0   | 1.000 |
| TP53   | Chr17 | 24  | 1503 | 1503 | 0   | 1.000 |
| CD79B  | Chr17 | 12  | 813  | 813  | 0   | 1.000 |
| BCL2   | Chr18 | 9   | 793  | 793  | 0   | 1.000 |
| TCF3   | Chr19 | 35  | 2572 | 2567 | 5   | 0.997 |
| KLF2   | Chr19 | 12  | 1128 | 968  | 160 | 0.936 |
| MEF2B  | Chr19 | 16  | 1267 | 1267 | 0   | 1.000 |
| CD79A  | Chr19 | 12  | 781  | 781  | 0   | 1.000 |
| CSF2RB | Chr22 | 38  | 2954 | 2954 | 0   | 1.000 |
| EP300  | Chr22 | 97  | 7865 | 7865 | 0   | 1.000 |
| BTK    | ChrX  | 33  | 2462 | 2462 | 0   | 1.000 |

2. Supplementary Figure 1 (Figure S1).

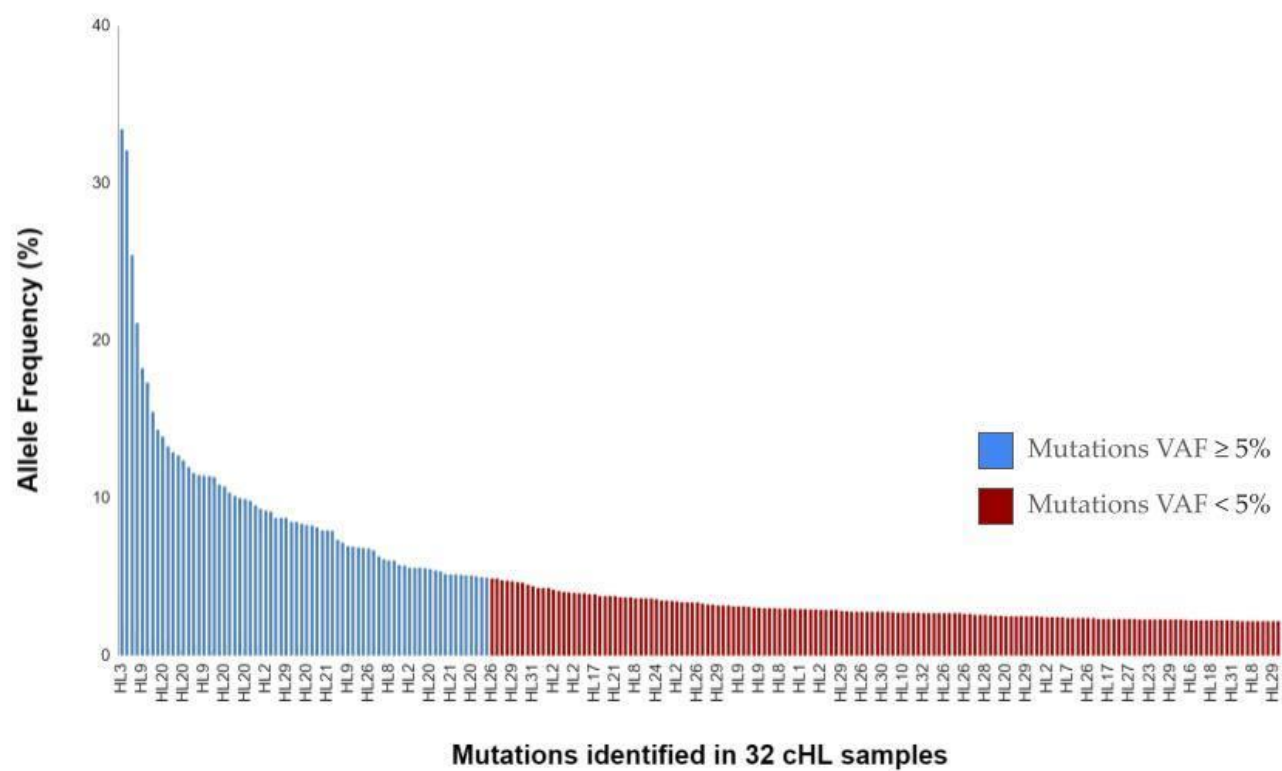

3. Supplementary Figure 2 (Figure S2).

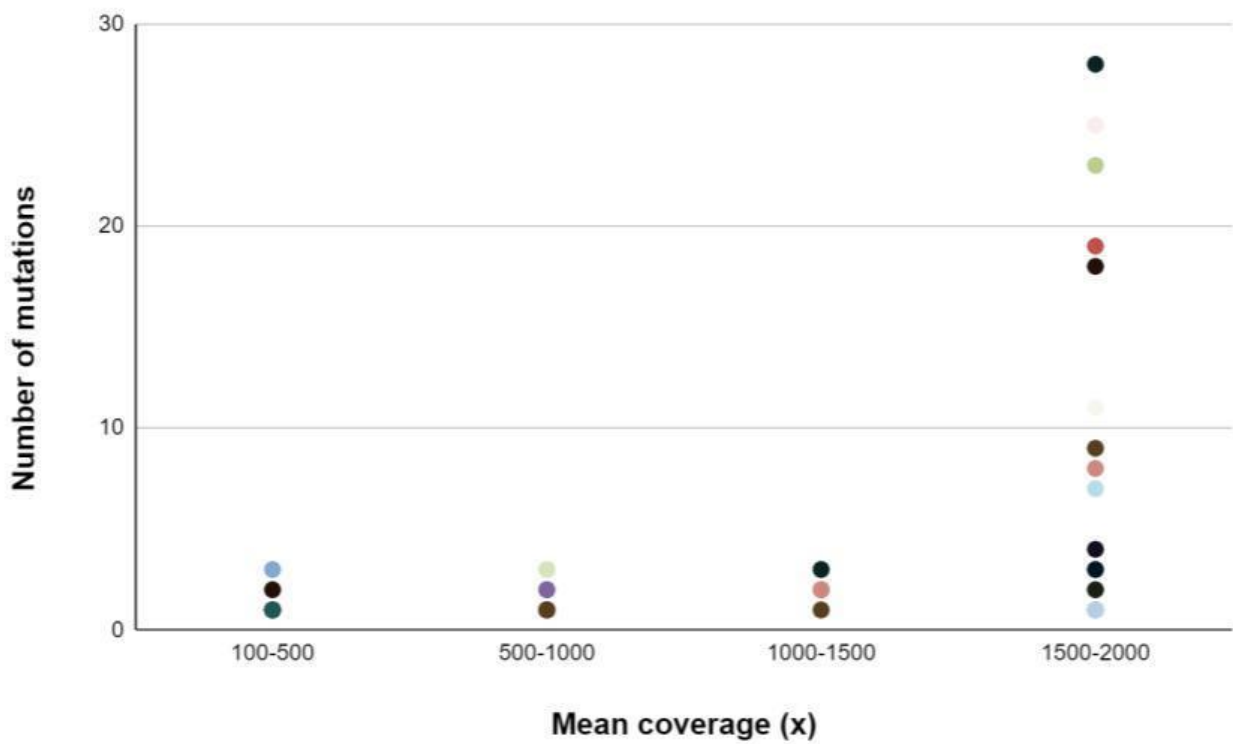

4. Supplementary Figure 3 (Figure S3).

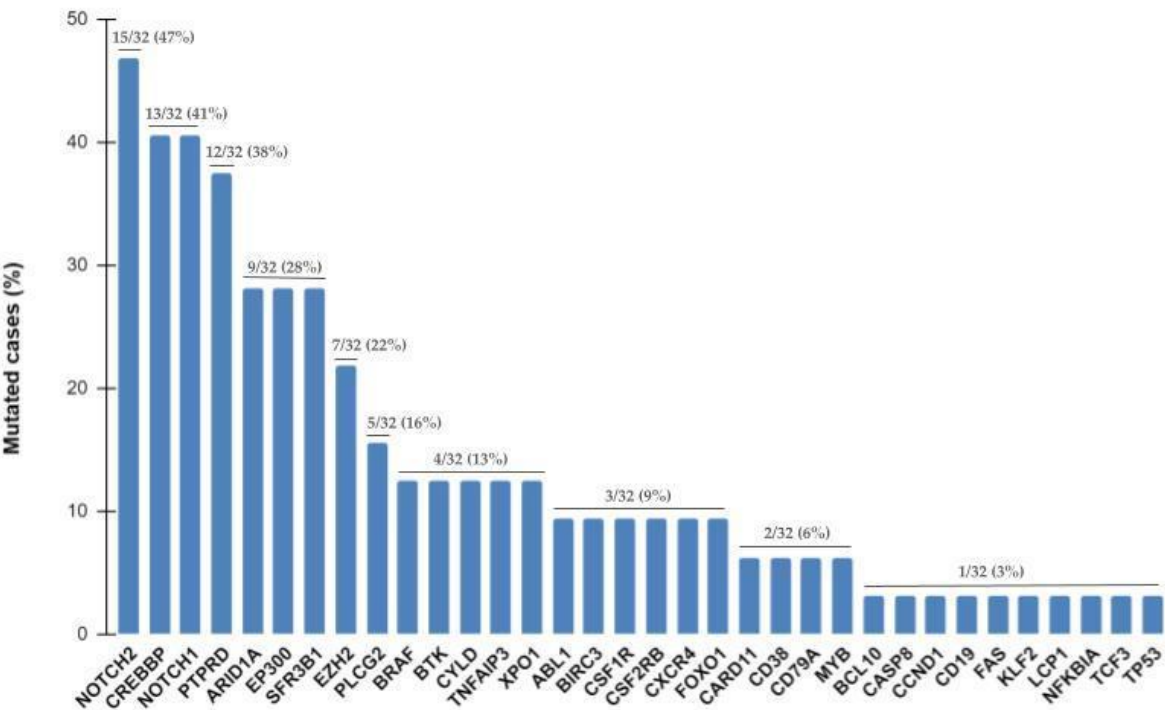

5. Supplementary Figure 4 (Figure S4).

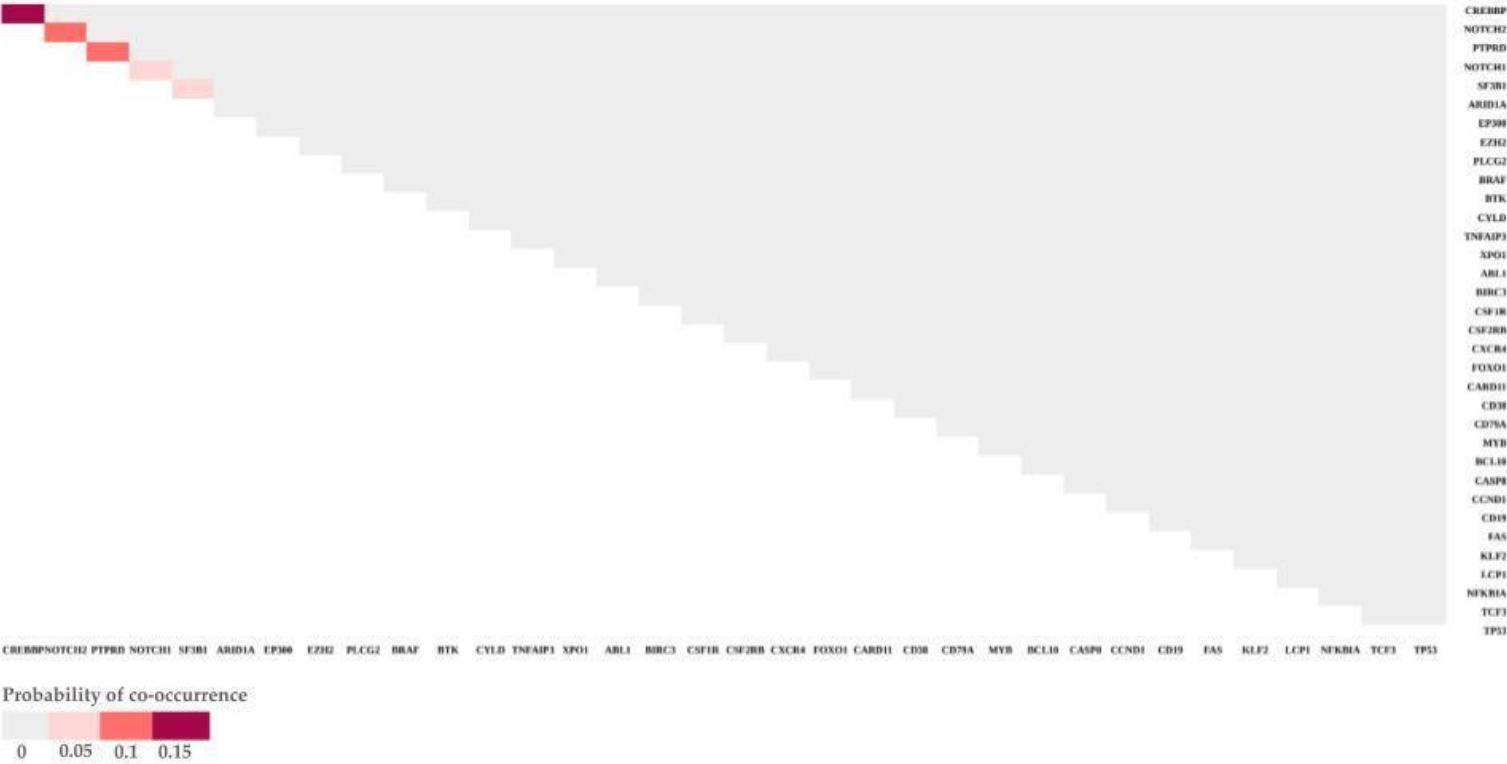

## 6. Supplementary Table 2 (Table S2).

| Case | Gen     | Locus          | Change | Allele frequency | Coverage | Type | Aminoacid change | Variant effect |
|------|---------|----------------|--------|------------------|----------|------|------------------|----------------|
| HL1  | NOTCH2  | chr1:120458038 | C>T    | 2.96             | 608      | SNV  | W2436Ter         | unknown        |
| HL1  | NOTCH2  | chr1:120458040 | G>A    | 2.96             | 608      | SNV  | D2435=           | unknown        |
| HL1  | CREBBP  | chr16:3779221  | G>A    | 7.96             | 113      | SNV  | P1943S           | missense       |
| HL2  | ARID1A  | chr1:27087932  | C>T    | 2.55             | 2000     | SNV  | S740F            | missense       |
| HL2  | ARID1A  | chr1:27101475  | C>T    | 3.15             | 2000     | SNV  | S1586F           | missense       |
| HL2  | ARID1A  | chr1:27101517  | C>T    | 5.00             | 2000     | SNV  | S1600F           | missense       |
| HL2  | NOTCH2  | chr1:120483311 | A>G    | 2.78             | 1976     | SNV  | F1017S           | unknown        |
| HL2  | SF3B1   | chr2:198268406 | G>A    | 3.45             | 2000     | SNV  | S541F            | missense       |
| HL2  | CSF1R   | chr5:149456895 | C>T    | 2.45             | 2000     | SNV  | C278Y            | missense       |
| HL2  | MYB     | chr6:135513668 | C>T    | 4.97             | 1770     | SNV  | S245F            | missense       |
| HL2  | TNFAIP3 | chr6:138200462 | G>A    | 2.70             | 2000     | SNV  | C627Y            | missense       |
| HL2  | EZH2    | chr7:148506444 | G>A    | 6.88             | 1279     | SNV  | R690C            | missense       |
| HL2  | EZH2    | chr7:148511175 | C>T    | 5.60             | 1999     | SNV  | C576Y            | missense       |
| HL2  | PTPRD   | chr9:8486196   | G>A    | 9.21             | 1716     | SNV  | S874F            | missense       |
| HL2  | NOTCH1  | chr9:139391169 | G>A    | 4.20             | 2000     | SNV  | S2341F           | missense       |
| HL2  | NOTCH1  | chr9:139396781 | G>A    | 5.74             | 122      | SNV  | S1776F           | missense       |
| HL2  | NOTCH1  | chr9:139399987 | C>T    | 2.90             | 2000     | SNV  | C1454Y           | missense       |
| HL2  | NOTCH1  | chr9:139400200 | C>T    | 5.75             | 1253     | SNV  | C1383Y           | missense       |
| HL2  | NOTCH1  | chr9:139401046 | C>T    | 4.05             | 2000     | SNV  | C1316Y           | missense       |
| HL2  | NOTCH1  | chr9:139412702 | C>T    | 2.60             | 1999     | SNV  | C381Y            | missense       |
| HL2  | NOTCH1  | chr9:139418369 | C>T    | 4.30             | 1999     | SNV  | C68Y             | missense       |
| HL2  | CREBBP  | chr16:3777966  | G>A    | 4.00             | 2000     | SNV  | S2361F           | missense       |
| HL2  | CREBBP  | chr16:3778035  | G>A    | 3.90             | 2000     | SNV  | S2338F           | missense       |
| HL2  | CREBBP  | chr16:3779601  | C>T    | 3.05             | 2000     | SNV  | C1816Y           | missense       |
| HL2  | CSF2RB  | chr22:37326825 | C>T    | 3.40             | 2000     | SNV  | S322F            | missense       |
| HL2  | EP300   | chr22:41553399 | G>A    | 7.35             | 952      | SNV  | C1163Y           | missense       |
| HL3  | NOTCH1  | chr9:139400260 | C>T    | 32.11            | 1118     | SNV  | C1363Y           | missense       |
| HL3  | PLCG2   | chr16:81925087 | A>G    | 9.56             | 952      | SNV  | Y293C            | missense       |
| HL3  | EP300   | chr22:41572396 | C>T    | 33.45            | 1115     | SNV  | S1642F           | missense       |
| HL4  | ARID1A  | chr1:27023345  | G>A    | 2.99             | 234      | SNV  | G151R            | missense       |
| HL4  | NOTCH2  | chr1:120458035 | GA>AA  | 6.94             | 577      | SNV  | S2437L           | unknown        |
| HL4  | KLF2    | chr19:16436384 | C>T    | 4.03             | 571      | SNV  | R145C            | missense       |
| HL5  | SF3B1   | chr2:198288557 | G>A    | 2.20             | 2000     | SNV  | S57L             | missense       |
| HL5  | CREBBP  | chr16:3779298  | G>A    | 2.29             | 1744     | SNV  | S1917L           | missense       |
| HL6  | PTPRD   | chr9:8521392   | C>T    | 2.83             | 1271     | SNV  | M282I            | missense       |
| HL6  | CYLD    | chr16:50815278 | C>T    | 9.32             | 472      | SNV  | S544L            | missense       |
| HL6  | EP300   | chr22:41573077 | C>T    | 2.20             | 2000     | SNV  | L1788F           | missense       |
| HL6  | BTX     | chrX:100611144 | C>T    | 2.25             | 2000     | SNV  | E488K            | missense       |
| HL7  | ARID1A  | chr1:27023346  | G>A    | 5.12             | 254      | SNV  | G151E            | missense       |

|      |         |                |     |       |      |     |        |          |
|------|---------|----------------|-----|-------|------|-----|--------|----------|
| HL7  | NOTCH2  | chr1:120458035 | G>A | 5.58  | 448  | SNV | S2437L | unknown  |
| HL7  | CARD11  | chr7:2976676   | C>T | 2.40  | 1794 | SNV | D446N  | missense |
| HL7  | CREBBP  | chr16:3820801  | C>T | 5.42  | 369  | SNV | A884T  | missense |
| HL8  | XPO1    | chr2:61719526  | G>A | 6.06  | 1122 | SNV | R553C  | missense |
| HL8  | SF3B1   | chr2:198260951 | C>T | 4.30  | 2000 | SNV | C1123Y | missense |
| HL8  | SF3B1   | chr2:198285835 | G>A | 3.00  | 1999 | SNV | S73F   | missense |
| HL8  | CD38    | chr4:15818196  | G>A | 2.35  | 1999 | SNV | C99Y   | missense |
| HL8  | EZH2    | chr7:148529748 | G>A | 3.65  | 1287 | SNV | S114F  | missense |
| HL8  | PTPRD   | chr9:8465639   | G>A | 2.20  | 2000 | SNV | R1181C | missense |
| HL8  | PTPRD   | chr9:8486196   | G>A | 2.25  | 2000 | SNV | S874F  | missense |
| HL8  | CYLD    | chr16:50813597 | C>T | 2.80  | 1998 | SNV | S384F  | missense |
| HL8  | PLCG2   | chr16:81892744 | C>T | 2.90  | 1553 | SNV | S152F  | missense |
| HL8  | CSF2RB  | chr22:37326726 | G>A | 2.75  | 2000 | SNV | C289Y  | missense |
| HL9  | NOTCH2  | chr1:120459112 | G>A | 2.25  | 2000 | SNV | S2078F | unknown  |
| HL9  | NOTCH2  | chr1:120508117 | C>T | 11.60 | 2000 | SNV | C547Y  | unknown, |
| HL9  | NOTCH2  | chr1:120512166 | G>A | 8.50  | 2000 | SNV | S359F  | unknown  |
| HL9  | XPO1    | chr2:61719273  | C>T | 2.70  | 1999 | SNV | C595Y  | missense |
| HL9  | XPO1    | chr2:61720185  | G>A | 4.90  | 2000 | SNV | R417C  | missense |
| HL9  | CXCR4   | chr2:136872509 | G>A | 12.93 | 1083 | SNV | S330F  | missense |
| HL9  | CXCR4   | chr2:136872542 | G>A | 4.30  | 2000 | SNV | S319F  | missense |
| HL9  | SF3B1   | chr2:198267447 | G>A | 7.20  | 2000 | SNV | S637F  | missense |
| HL9  | SF3B1   | chr2:198267525 | G>A | 3.40  | 2000 | SNV | S611F  | missense |
| HL9  | CASP8   | chr2:202149671 | G>A | 6.95  | 2000 | SNV | C371Y  | missense |
| HL9  | TNFAIP3 | chr6:138200266 | C>T | 10.87 | 1996 | SNV | R562C  | missense |
| HL9  | TNFAIP3 | chr6:138200417 | G>A | 6.85  | 1999 | SNV | C612Y  | missense |
| HL9  | CARD11  | chr7:2987326   | G>A | 6.05  | 2000 | SNV | R35C   | missense |
| HL9  | BRAF    | chr7:140434455 | C>T | 4.50  | 2000 | SNV | C748Y  | missense |
| HL9  | BRAF    | chr7:140534539 | G>A | 7.93  | 1993 | SNV | S125F  | missense |
| HL9  | PTPRD   | chr9:8376719   | C>T | 3.05  | 2000 | SNV | C1465Y | missense |
| HL9  | PTPRD   | chr9:8389326   | G>A | 14.36 | 1999 | SNV | S1431F | missense |
| HL9  | PTPRD   | chr9:8525005   | G>A | 5.20  | 2000 | SNV | S200F  | missense |
| HL9  | NOTCH1  | chr9:139412326 | C>T | 3.15  | 2000 | SNV | C440Y  | missense |
| HL9  | NOTCH1  | chr9:139418351 | C>T | 12.71 | 1109 | SNV | C74Y   | missense |
| HL9  | NOTCH1  | chr9:139418369 | C>T | 21.13 | 1112 | SNV | C68Y   | missense |
| HL9  | FOXO1   | chr13:41134540 | G>A | 11.45 | 2000 | SNV | S363F  | missense |
| HL9  | CREBBP  | chr16:3843410  | C>T | 10.15 | 2000 | SNV | C398Y  | missense |
| HL9  | PLCG2   | chr16:81979834 | C>T | 3.65  | 2000 | SNV | S1179F | missense |
| HL9  | TCF3    | chr19:1625604  | G>A | 11.98 | 1995 | SNV | S157F  | missense |
| HL9  | BTK     | chrX:100604932 | G>A | 18.25 | 1940 | SNV | R641C  | missense |
| HL10 | SF3B1   | chr2:198268326 | G>A | 2.75  | 2000 | SNV | R568C  | missense |
| HL10 | PTPRD   | chr9:8528612   | G>A | 2.40  | 1998 | SNV | R174C  | missense |
| HL10 | CREBBP  | chr16:3830859  | G>A | 2.50  | 1999 | SNV | S566F  | missense |
| HL11 | NOTCH2  | chr1:120496297 | C>T | 2.50  | 2000 | SNV | C745Y  | unknown  |



|      |         |                |     |       |      |     |        |          |
|------|---------|----------------|-----|-------|------|-----|--------|----------|
| HL11 | CREBBP  | chr16:3778035  | G>A | 2.71  | 1996 | SNV | S2338F | missense |
| HL12 | NOTCH2  | chr1:120458035 | G>A | 3.03  | 628  | SNV | S2437L | unknown  |
| HL13 | PTPRD   | chr9:8636728   | C>T | 3.64  | 1952 | SNV | G61R   | missense |
| HL14 | NOTCH1  | chr9:139412651 | C>T | 2.64  | 605  | SNV | C398Y  | missense |
| HL15 | ARID1A  | chr1:27101427  | C>T | 3.25  | 123  | SNV | S1570F | missense |
| HL15 | TNFAIP3 | chr6:138200417 | G>A | 2.32  | 604  | SNV | C612Y  | missense |
| HL15 | TNFAIP3 | chr6:138200462 | G>A | 3.13  | 607  | SNV | C627Y  | missense |
| HL15 | EP300   | chr22:41554444 | G>A | 3.52  | 711  | SNV | C1177Y | missense |
| HL15 | EP300   | chr22:41572519 | G>A | 2.35  | 426  | SNV | C1683Y | missense |
| HL16 | NOTCH1  | chr9:139399786 | C>T | 2.60  | 1075 | SNV | C1521Y | missense |
| HL17 | BCL10   | chr1:85736574  | G>A | 2.35  | 1997 | SNV | R25C   | missense |
| HL17 | NOTCH2  | chr1:120529606 | C>T | 2.95  | 2000 | SNV | C284Y  | unknown  |
| HL17 | SF3B1   | chr2:198268326 | G>A | 2.45  | 2000 | SNV | R568C  | missense |
| HL17 | PTPRD   | chr9:8501014   | G>A | 2.30  | 2000 | SNV | S623F  | missense |
| HL17 | BTK     | chrX:100612562 | G>A | 2.95  | 1558 | SNV | S371F  | missense |
| HL17 | BTK     | chrX:100613303 | G>A | 2.40  | 1999 | SNV | S366F  | missense |
| HL17 | BTK     | chrX:100614327 | G>A | 3.90  | 2000 | SNV | S283F  | missense |
| HL18 | XPO1    | chr2:61719528  | G>A | 2.25  | 2000 | SNV | P552L  | missense |
| HL18 | CREBBP  | chr16:3786784  | G>A | 2.25  | 1999 | SNV | P1476L | missense |
| HL19 | NOTCH1  | chr9:139390602 | G>A | 5.35  | 2000 | SNV | S2530F | missense |
| HL19 | NOTCH1  | chr9:139413174 | C>T | 2.35  | 2000 | SNV | C323Y  | missense |
| HL20 | ARID1A  | chr1:27101529  | C>T | 6.12  | 1339 | SNV | S1604F | missense |
| HL20 | NOTCH2  | chr1:120458083 | G>A | 4.69  | 1920 | SNV | S2421F | unknown  |
| HL20 | NOTCH2  | chr1:120458830 | G>A | 10.75 | 1990 | SNV | S2172F | unknown  |
| HL20 | NOTCH2  | chr1:120479990 | C>T | 5.10  | 2000 | SNV | C1146Y | unknown  |
| HL20 | NOTCH2  | chr1:120510064 | C>T | 11.35 | 2000 | SNV | C482Y  | unknown  |
| HL20 | NOTCH2  | chr1:120548005 | C>T | 6.69  | 1584 | SNV | C82Y   | missense |
| HL20 | CXCR4   | chr2:136872542 | G>A | 5.50  | 2000 | SNV | S319F  | missense |
| HL20 | CXCR4   | chr2:136872710 | G>A | 8.15  | 2000 | SNV | S263F  | missense |
| HL20 | CXCR4   | chr2:136872936 | G>A | 2.80  | 2000 | SNV | R188C  | missense |
| HL20 | SF3B1   | chr2:198265046 | G>A | 25.45 | 1163 | SNV | S944F  | missense |
| HL20 | SF3B1   | chr2:198267525 | G>A | 2.45  | 1999 | SNV | S611F  | missense |
| HL20 | SF3B1   | chr2:198270028 | C>A | 2.51  | 998  | SNV | D470Y  | missense |
| HL20 | CSF1R   | chr5:149435624 | G>A | 10.35 | 2000 | SNV | S840F  | missense |
| HL20 | CSF1R   | chr5:149456898 | G>A | 8.40  | 2000 | SNV | S277F  | missense |
| HL20 | BRAF    | chr7:140534539 | G>A | 13.93 | 1673 | SNV | S125F  | missense |
| HL20 | PTPRD   | chr9:8465639   | G>A | 13.28 | 1883 | SNV | R1181C | missense |
| HL20 | ABL1    | chr9:133753844 | C>T | 8.77  | 1996 | SNV | S438F  | missense |
| HL20 | ABL1    | chr9:133760976 | G>A | 11.41 | 1999 | SNV | C1100Y | missense |
| HL20 | NOTCH1  | chr9:139396271 | G>A | 5.10  | 1999 | SNV | S1856F | missense |
| HL20 | NOTCH1  | chr9:139397747 | C>T | 3.70  | 2000 | SNV | C1685Y | missense |
| HL20 | NOTCH1  | chr9:139399909 | G>A | 12.4  | 2000 | SNV | S1480F | missense |
| HL20 | NOTCH1  | chr9:139401777 | G>A | 8.50  | 1705 | SNV | S1208F | missense |

|      |         |                |     |       |      |     |        |          |
|------|---------|----------------|-----|-------|------|-----|--------|----------|
| HL20 | NOTCH1  | chr9:139405212 | C>T | 11.46 | 1998 | SNV | C878Y  | missense |
| HL20 | NOTCH1  | chr9:139409025 | G>A | 5.55  | 1999 | SNV | S715F  | missense |
| HL20 | CREBBP  | chr16:3788659  | G>A | 3.30  | 1151 | SNV | S1432F | missense |
| HL20 | CREBBP  | chr16:3808012  | G>A | 9.95  | 2000 | SNV | S1136F | missense |
| HL20 | PLCG2   | chr16:81979834 | C>T | 8.30  | 1999 | SNV | S1179F | missense |
| HL20 | EP300   | chr22:41554444 | G>A | 17.34 | 1811 | SNV | C1177Y | missense |
| HL20 | EP300   | chr22:41574836 | C>T | 3.80  | 2000 | SNV | S2374F | missense |
| HL21 | ARID1A  | chr1:27101475  | C>T | 3.78  | 1877 | SNV | S1586F | missense |
| HL21 | NOTCH2  | chr1:120548023 | C>T | 8.76  | 1998 | SNV | C76Y   | missense |
| HL21 | CXCR4   | chr2:136872936 | G>A | 5.60  | 2000 | SNV | R188C  | missense |
| HL21 | NOTCH1  | chr9:139390557 | G>A | 2.20  | 2000 | SNV | S2545F | missense |
| HL21 | NOTCH1  | chr9:139399461 | C>T | 15.48 | 1311 | SNV | C1561Y | missense |
| HL21 | NOTCH1  | chr9:139412212 | C>T | 2.50  | 2000 | SNV | C478Y  | missense |
| HL21 | NOTCH1  | chr9:139412326 | C>T | 7.95  | 2000 | SNV | C440Y  | missense |
| HL21 | NOTCH1  | chr9:139412377 | C>T | 5.15  | 2000 | SNV | C423Y  | missense |
| HL21 | CD19    | chr16:28944633 | C>T | 10.01 | 1999 | SNV | S213F  | missense |
| HL21 | CD79A   | chr19:42384974 | C>T | 2.25  | 2000 | SNV | S203F  | missense |
| HL21 | EP300   | chr22:41523636 | G>A | 9.84  | 1992 | SNV | C351Y  | missense |
| HL21 | EP300   | chr22:41546102 | C>T | 3.80  | 1999 | SNV | S906F  | missense |
| HL22 | CREBBP  | chr16:3779313  | G>A | 2.48  | 565  | SNV | S1912L | missense |
| HL23 | NOTCH1  | chr9:139413075 | G>A | 2.30  | 2000 | SNV | S356F  | missense |
| HL23 | NOTCH1  | chr9:139418402 | C>T | 2.30  | 2000 | SNV | C57Y   | missense |
| HL24 | NOTCH2  | chr1:120458035 | G>A | 3.60  | 862  | SNV | S2437L | unknown  |
| HL24 | CREBBP  | chr16:3779194  | G>A | 2.30  | 434  | SNV | P1952S | missense |
| HL25 | PTPRD   | chr9:8449827   | C>T | 3.70  | 135  | SNV | E1296K | missense |
| HL26 | ARID1A  | chr1:27087944  | C>T | 2.8   | 2000 | SNV | S744L  | missense |
| HL26 | ARID1A  | chr1:27094294  | C>T | 3.00  | 2000 | SNV | S1001F | missense |
| HL26 | ARID1A  | chr1:27099437  | C>T | 3.40  | 1999 | SNV | S1225F | missense |
| HL26 | ARID1A  | chr1:27106331  | G>A | 2.35  | 2000 | SNV | C1981Y | missense |
| HL26 | ARID1A  | chr1:27106394  | C>T | 2.90  | 2000 | SNV | S2002F | missense |
| HL26 | NOTCH2  | chr1:120480551 | C>T | 5.15  | 2000 | SNV | C1089Y | unknown  |
| HL26 | NOTCH2  | chr1:120480557 | C>T | 2.25  | 1999 | SNV | C1087Y | unknown  |
| HL26 | SF3B1   | chr2:198264983 | C>T | 4.75  | 2000 | SNV | C965Y  | missense |
| HL26 | SF3B1   | chr2:198265046 | G>A | 3.80  | 2000 | SNV | S944F  | missense |
| HL26 | TNFAIP3 | chr6:138196907 | C>T | 2.80  | 2000 | SNV | S190L  | missense |
| HL26 | TNFAIP3 | chr6:138197226 | G>A | 2.80  | 2000 | SNV | C243Y  | missense |
| HL26 | BRAF    | chr7:140439685 | C>T | 6.82  | 1628 | SNV | C685Y  | missense |
| HL26 | BRAF    | chr7:140534578 | G>A | 4.80  | 2000 | SNV | S112F  | missense |
| HL26 | EZH2    | chr7:148506444 | G>A | 2.80  | 1999 | SNV | R690C  | missense |
| HL26 | PTPRD   | chr9:8521522   | G>A | 4.91  | 1896 | SNV | S239F  | missense |
| HL26 | PTPRD   | chr9:8636799   | G>A | 2.70  | 2000 | SNV | S37F   | missense |
| HL26 | ABL1    | chr9:133748382 | C>T | 2.75  | 2000 | SNV | S348L  | missense |
| HL26 | NOTCH1  | chr9:139391328 | G>A | 3.10  | 2000 | SNV | S2288F | missense |

|      |        |                 |     |      |      |     |        |          |
|------|--------|-----------------|-----|------|------|-----|--------|----------|
| HL26 | NOTCH1 | chr9:139413075  | G>A | 4.10 | 2000 | SNV | S356F  | missense |
| HL26 | FAS    | chr10:90768748  | G>A | 2.57 | 1871 | SNV | C146Y  | missense |
| HL26 | BIRC3  | chr11:102195394 | C>T | 3.50 | 1917 | SNV | R52C   | missense |
| HL26 | FOXO1  | chr13:41134759  | G>A | 2.30 | 2000 | SNV | S290L  | missense |
| HL26 | FOXO1  | chr13:41240231  | G>A | 2.40 | 2000 | SNV | S40F   | missense |
| HL26 | LCP1   | chr13:46701847  | G>A | 2.35 | 2000 | SNV | S588F  | missense |
| HL26 | NFKBIA | chr14:35873624  | G>A | 2.53 | 1346 | SNV | S76L   | missense |
| HL26 | CREBBP | chr16:3808901   | G>A | 3.96 | 1010 | SNV | S1108L | missense |
| HL26 | CYLD   | chr16:50827556  | G>A | 8.26 | 218  | SNV | C814Y  | missense |
| HL26 | PLCG2  | chr16:81979834  | C>T | 2.40 | 2000 | SNV | S1179F | missense |
| HL26 | TP53   | chr17:7579406   | G>A | 3.95 | 1999 | SNV | S94L   | missense |
| HL26 | CSF2RB | chr22:37325841  | C>T | 3.40 | 1325 | SNV | S237F  | missense |
| HL26 | EP300  | chr22:41553210  | C>T | 9.15 | 973  | SNV | S1100F | missense |
| HL26 | BTK    | chrX:100611065  | G>A | 2.65 | 1999 | SNV | S514L  | missense |
| HL26 | BTK    | chrX:100614327  | G>A | 4.65 | 1999 | SNV | S283F  | missense |
| HL27 | CSF1R  | chr5:149456898  | G>A | 2.35 | 2000 | SNV | S277F  | missense |
| HL27 | EZH2   | chr7:148529748  | G>A | 2.75 | 1925 | SNV | S114F  | missense |
| HL27 | NOTCH1 | chr9:139405621  | C>T | 2.22 | 1984 | SNV | C857Y  | missense |
| HL27 | CYLD   | chr16:50825570  | C>T | 2.20 | 1998 | SNV | S734F  | missense |
| HL28 | EZH2   | chr7:148529748  | G>A | 2.45 | 2000 | SNV | S114F  | missense |
| HL28 | NOTCH1 | chr9:139412717  | C>T | 2.60 | 2000 | SNV | C376Y  | missense |
| HL29 | ARID1A | chr1:27099437   | C>T | 3.70 | 2000 | SNV | S1225F | missense |
| HL29 | NOTCH2 | chr1:120480551  | C>T | 2.30 | 2000 | SNV | C1089Y | unknown  |
| HL29 | NOTCH2 | chr1:120484158  | C>T | 2.50 | 1999 | SNV | C991Y  | unknown  |
| HL29 | NOTCH2 | chr1:120496297  | C>T | 3.19 | 1787 | SNV | C745Y  | unknown  |
| HL29 | NOTCH2 | chr1:120509040  | C>T | 2.75 | 2000 | SNV | C509Y  | unknown  |
| HL29 | NOTCH2 | chr1:120510184  | C>T | 3.65 | 2000 | SNV | C442Y  | unknown  |
| HL29 | SF3B1  | chr2:198285835  | G>A | 2.20 | 2000 | SNV | S73F   | missense |
| HL29 | MYB    | chr6:135524371  | C>T | 4.74 | 1665 | SNV | S693F  | missense |
| HL29 | EZH2   | chr7:148529754  | G>A | 8.76 | 468  | SNV | S112F  | missense |
| HL29 | PTPRD  | chr9:8518336    | G>A | 3.49 | 1946 | SNV | S352F  | missense |
| HL29 | PTPRD  | chr9:8527350    | G>A | 6.30 | 635  | SNV | S182F  | missense |
| HL29 | ABL1   | chr9:133748328  | G>A | 3.25 | 2000 | SNV | C330Y  | missense |
| HL29 | NOTCH1 | chr9:139391370  | G>A | 2.40 | 2000 | SNV | S2274F | missense |
| HL29 | NOTCH1 | chr9:139395029  | G>A | 3.20 | 2000 | SNV | S1970F | missense |
| HL29 | NOTCH1 | chr9:139401046  | C>T | 2.20 | 2000 | SNV | C1316Y | missense |
| HL29 | NOTCH1 | chr9:139409025  | G>A | 2.50 | 2000 | SNV | S715F  | missense |
| HL29 | NOTCH1 | chr9:139413066  | C>T | 2.50 | 2000 | SNV | C359Y  | missense |
| HL29 | BIRC3  | chr11:102207780 | T>C | 2.97 | 101  | SNV | C588R  | missense |
| HL29 | CD79A  | chr19:42383333  | C>T | 2.70 | 2000 | SNV | S118F  | missense |
| HL29 | EP300  | chr22:41553210  | C>T | 5.06 | 1998 | SNV | S1100F | missense |
| HL29 | EP300  | chr22:41553399  | G>A | 2.86 | 1853 | SNV | C1163Y | missense |
| HL30 | CCND1  | chr11:69456221  | G>A | 3.20 | 2000 | SNV | C47Y   | missense |

|      |        |                 |     |      |      |     |        |          |
|------|--------|-----------------|-----|------|------|-----|--------|----------|
| HL30 | FOXO1  | chr13:41134594  | G>A | 2.30 | 2000 | SNV | S345F  | missense |
| HL30 | CREBBP | chr16:3823915   | G>A | 2.80 | 2000 | SNV | S767F  | missense |
| HL31 | ARID1A | chr1:27087417   | C>T | 2.70 | 2000 | SNV | S664L  | missense |
| HL31 | NOTCH2 | chr1:120512190  | G>A | 2.90 | 2000 | SNV | S351F  | unknown  |
| HL31 | XPO1   | chr2:61709605   | G>A | 3.03 | 363  | SNV | S961L  | missense |
| HL31 | CD38   | chr4:15818256   | G>A | 2.20 | 2000 | SNV | C119Y  | missense |
| HL31 | BRAF   | chr7:140439685  | C>T | 2.25 | 2000 | SNV | C685Y  | missense |
| HL31 | BRAF   | chr7:140508719  | C>T | 2.35 | 2000 | SNV | C194Y  | missense |
| HL31 | EZH2   | chr7:148506428  | G>A | 2.25 | 1999 | SNV | S695L  | missense |
| HL31 | EZH2   | chr7:148529748  | G>A | 4.41 | 1450 | SNV | S114F  | missense |
| HL31 | PTPRD  | chr9:8376719    | C>T | 2.70 | 2000 | SNV | C1465Y | missense |
| HL31 | PTPRD  | chr9:8518336    | G>A | 2.30 | 1999 | SNV | S352F  | missense |
| HL31 | BIRC3  | chr11:102198785 | G>A | 3.01 | 632  | SNV | C319Y  | missense |
| HL31 | EP300  | chr22:41527497  | C>T | 2.80 | 2000 | SNV | S463F  | missense |
| HL32 | NOTCH2 | chr1:120469204  | C>T | 2.72 | 147  | SNV | C1308Y | unknown  |

7. Supplementary Figure 6 (Figure S6).

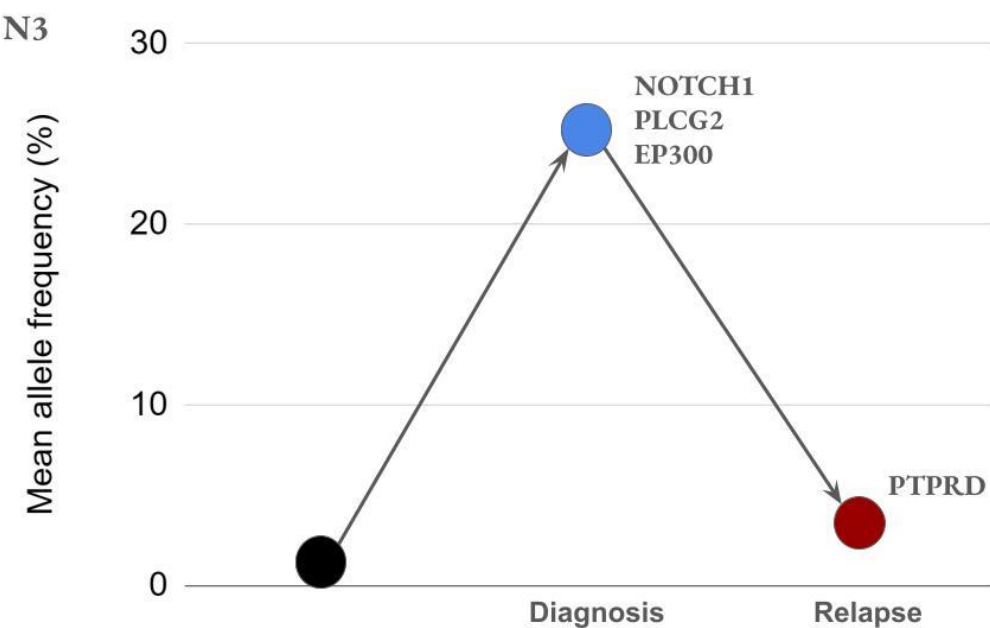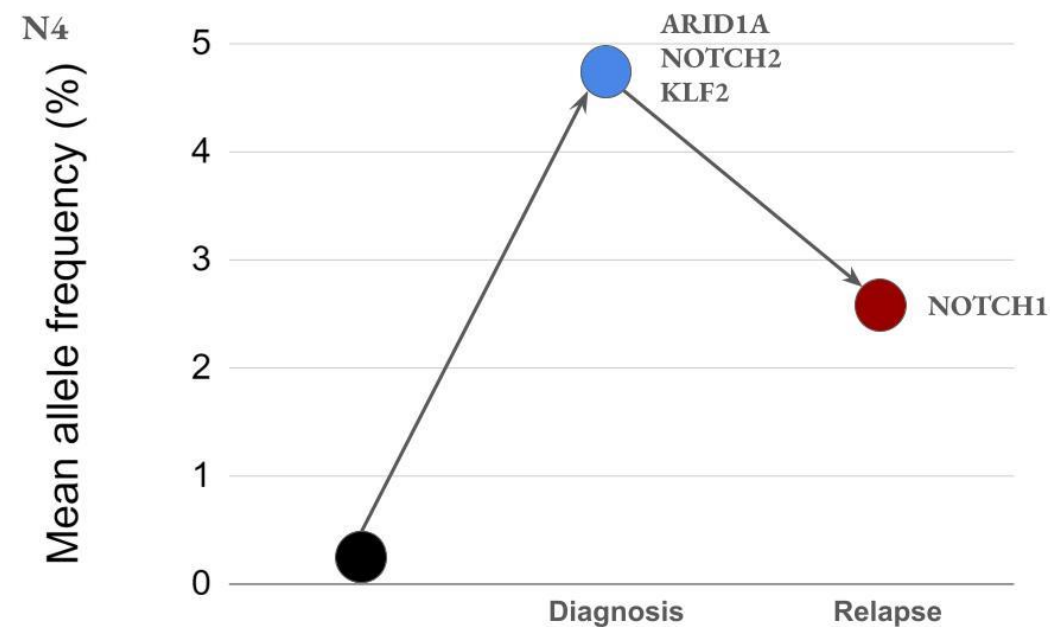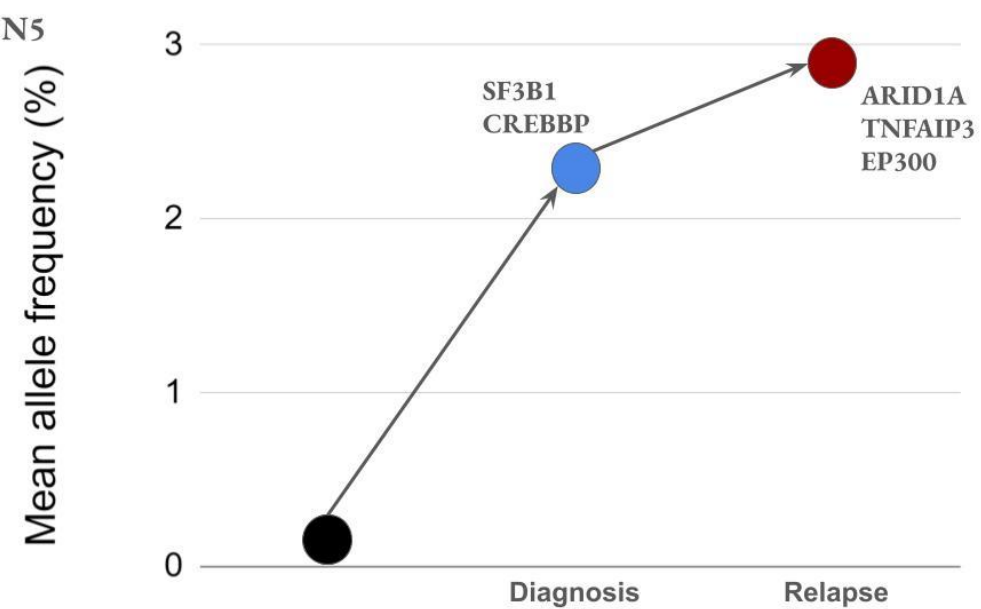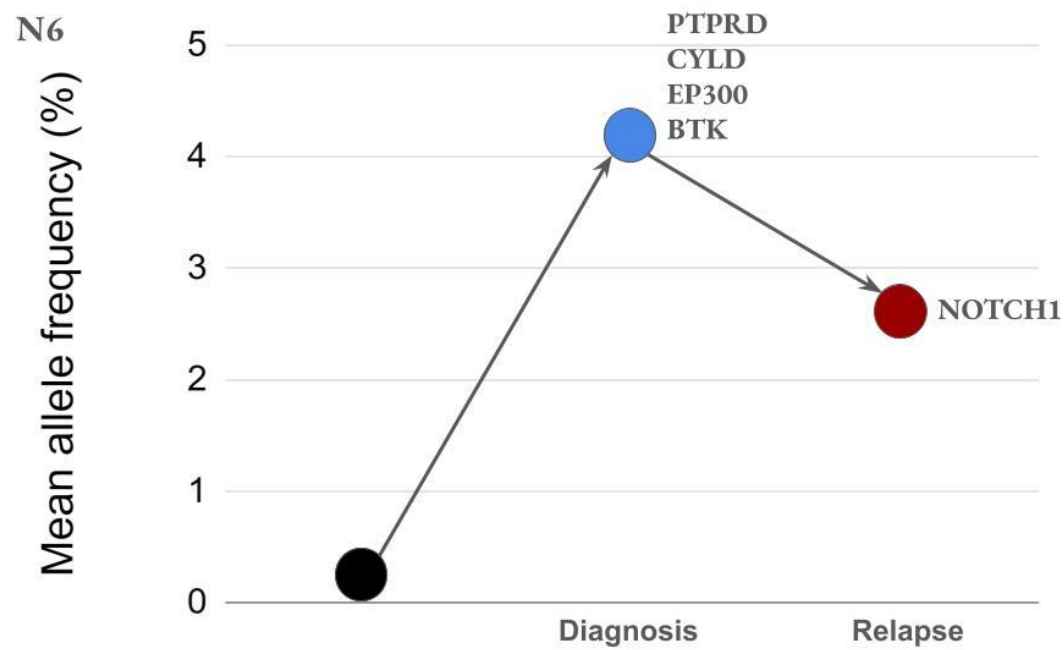

8. Supplementary Figure 7 (Figure S7).

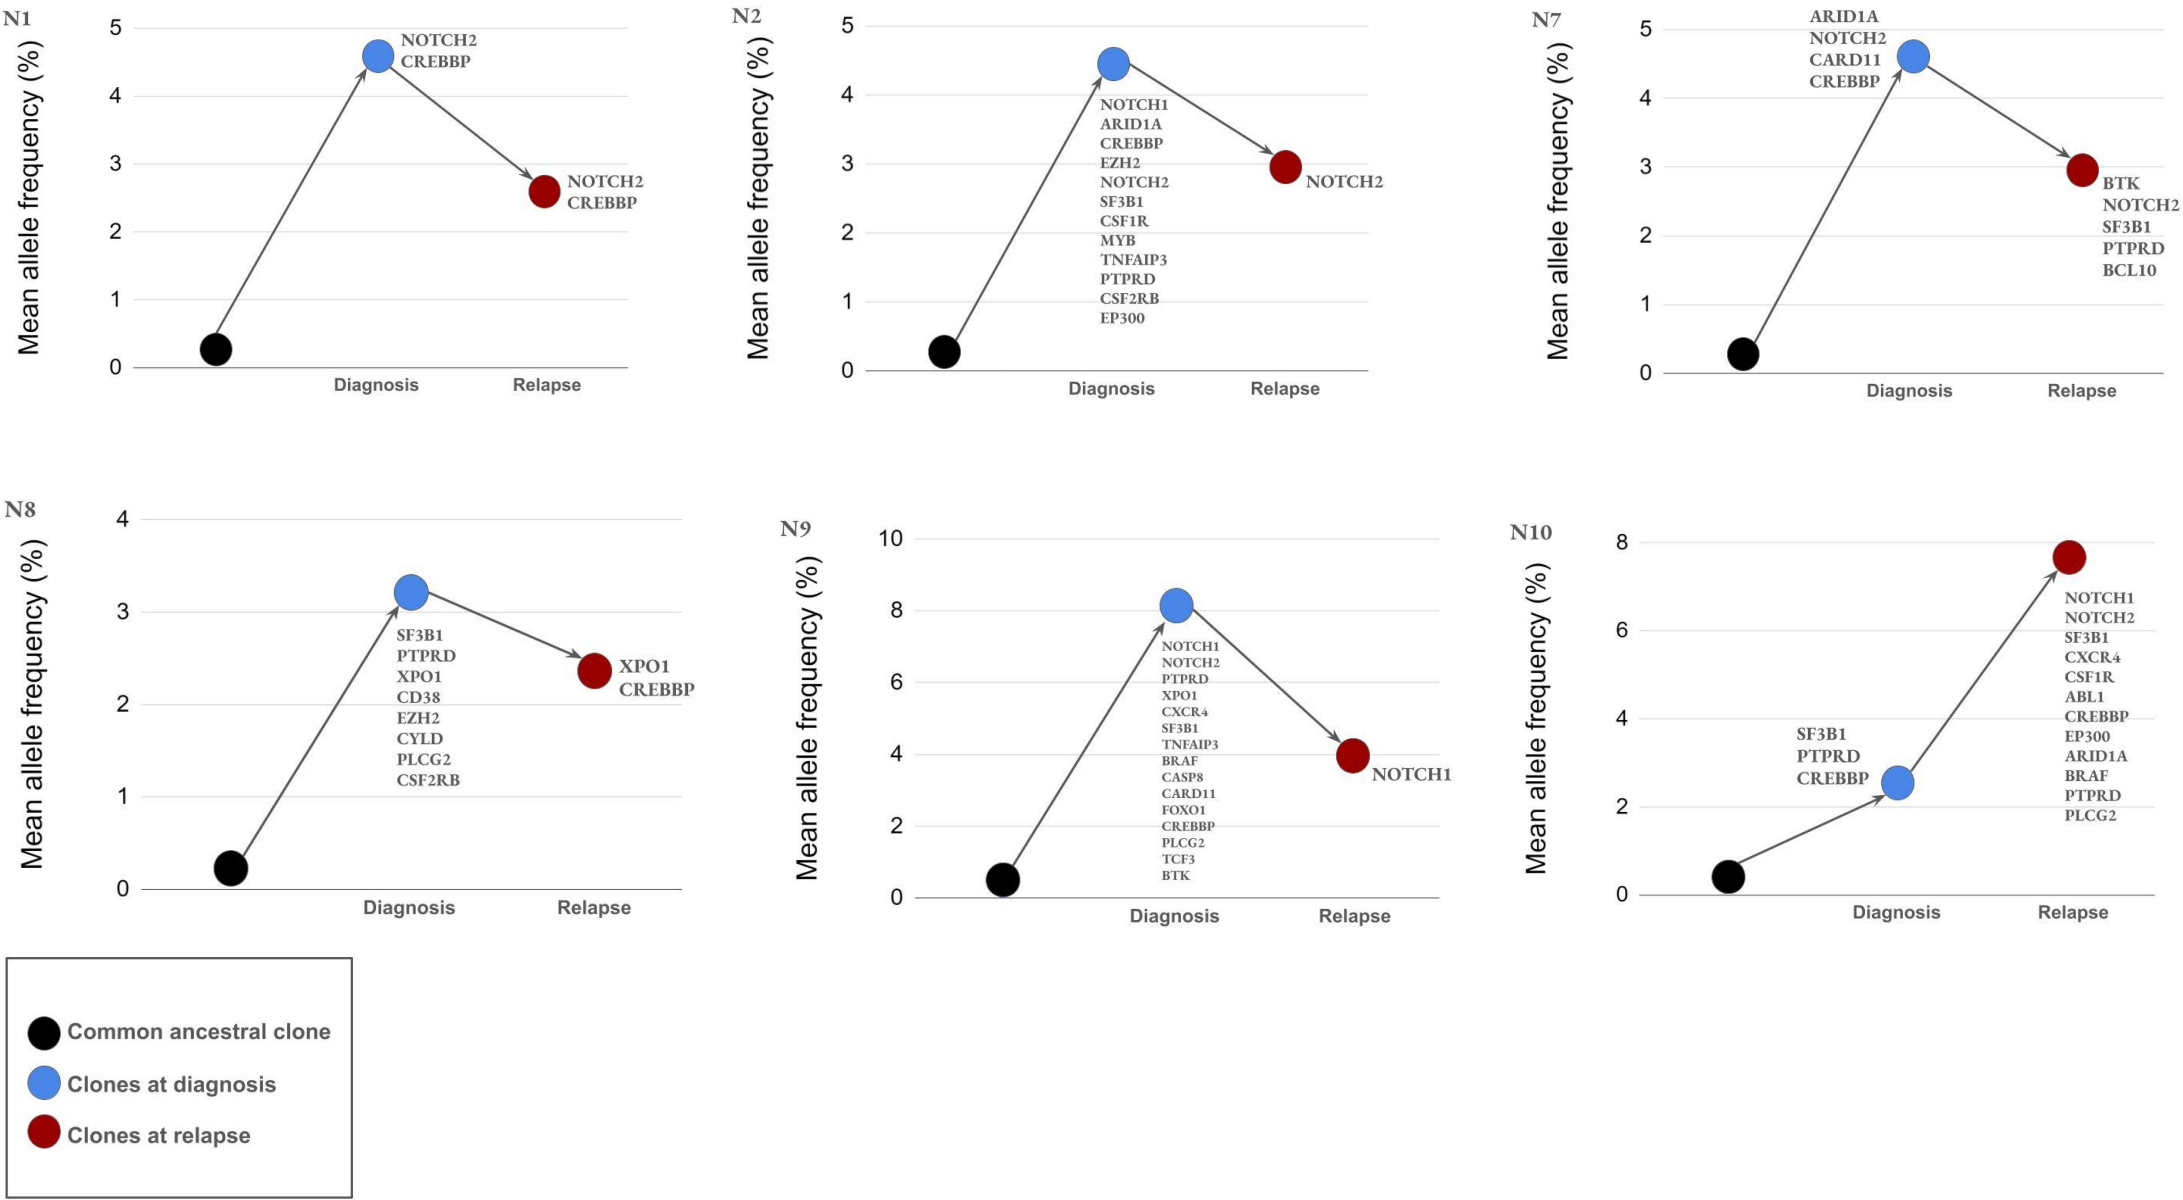

Supplement: s1 [file s1]
